# Supplementary material for: Toe Grip strength declines earlier than hand grip strength and knee extension strength in community-dwelling older men: a cross sectional study
Source: J Foot Ankle Res. 2022 Oct 25;15:79. doi: 10.1186/s13047-022-00584-x (PMC9594870; doi:10.1186/s13047-022-00584-x)
Supplement: Supplementary file 1 — Additional file 1. Model comparison of linear mixed effect model in men. [file 13047_2022_584_MOESM1_ESM.xlsx]

## Sheet: TableⅠ
	Additional file 1. Model comparison of linear mixed effect model in men
		Model 0	Model 1	Model 2	Model 3	Model 4	Model 5
	Intercept	30.6946*	15.3797*	10.026*	17.851*	19.323	17.43
	Age group		-2.2965*	-2.090*	-2.159*	-2.024*	-1.733*
	Muscle strength		11.3412*	11.428*	11.332*	11.432*	11.433*
	BMI		0.4958*	0.655*	0.5332	0.740*	0.737*
	SBP				-0.0053	-0.021	-0.025
	DBP				-0.3445	-0.064	-0.062
	Albumin					0.227	0.114
	hsCRP			8.960*		8.969*	9.155*
	eGFR					-0.029	-0.027
	LDL-C					-0.0002	0.001
	HDL-C					-0.01	-0.008
	HbA1c					-0.322	-0.468
	Smoking habit						1.105
	Alcohol drinking habit						0.509
	Age group*Muscle strength		-0.2235	-0.202*	-0.2606	-0.199	1.786
	AIC	2932.51	2495.42	1663.05	2456.53	1672.68	1674.57
	BMI, body mass index; SBP, systolic blood pressure; DBP, diastolic blood pressure; hsCRP, high-sensitivity C-reactive protein; eGFR, estimated glomerular filtration rate; LDL-C, low-density lipoprotein cholesterol; HDL-C, high-density lipoprotein cholesterol; HbA1c, Hemoglobin A1c; AIC, Akaike's Information Criterion. *, P<0.05
